# Supplementary material
Source: PubMed Central journal article supplement (PMC2077040)
Supplement: pnas_0707045104_3.pdf [file pnas_0707045104_3.pdf]

**SI Table 1. In vitro assays using *S<sup>V</sup>/lacZ/Flt1+12* fetal liver cells**

| Colony type | Unsorted  | <i>lacZ</i> <sup>+</sup> | <i>lacZ</i> <sup>-</sup> |
|-------------|-----------|--------------------------|--------------------------|
| CFU-GMEM    | 8 ± 1.8   | 24.2 ± 5.4               | 1.6 ± 1                  |
| CFU-GM      | 3.5 ± 1.3 | 7.8 ± 2.8                | 0.6 ± 0.8                |
| BFU-E       | 0         | 1.5 ± 1.6                | 0                        |

Results of *in vitro* methyl cellulose culture of unsorted and sorted *lacZ*<sup>+</sup> and *lacZ*<sup>-</sup> FDG-treated *SV/lacZ/FLI1+12* FL cells. Cells targeted by the *SV/lacZ/FLI1+12* transgene have greater multilineage potential. GMEM, granulocyte macrophage/erythroid megakaryocyte; GM, granulocyte macrophage; BFU-E, burst-forming unit-erythroid.
