# Supplementary material
Source: PubMed Central journal article supplement (PMC2077040)
Supplement: pnas_0707045104_4.pdf [file pnas_0707045104_4.pdf]

**SI Table 2. Transplantation assay using *SV/LacZ/Fli1+12* fetal liver cells**

| Colony type              | Reconstitution (%) | Percent chimerism |
|--------------------------|--------------------|-------------------|
| <i>lacZ</i> <sup>+</sup> | 5 of 15 (33)       | 1–100             |
| <i>lacZ</i> <sup>−</sup> | 1 of 13 (7.7)      | 10                |

Results of transplantations ( $n = 2$ ) of FDG-treated and sorted *SV/lacZ/FLI1+12* FL cells into sublethally irradiated recipient mice. Cells targeted by the *SV/lacZ/FLI1+12* transgene have greater potential for long-term bone marrow reconstitution (numbers of cells transplanted: *lacZ*<sup>+</sup>,  $10^4$ ; *lacZ*<sup>−</sup>, 1 or  $5 \times 10^5$ ).
