# Supplementary material
Source: PubMed Central journal article supplement (PMC2077040)
Supplement: pnas_0707045104_5.pdf [file pnas_0707045104_5.pdf]

**SI Table 3. *In silico* search for potential hematopoietic enhancers**

| Conserved TFBS combination                         | Window, bp | No. of clusters |
|----------------------------------------------------|------------|-----------------|
| 2 [Ets] + 1 [Gata]*                                | 50         | 12,388          |
| 6 [Ets] + 2 [Gata] + 1 [E-Box] <sup>†</sup>        | 220        | 335             |
| 4 [Ets] + 2 [Gata] + 1 [E-Box] <sup>†</sup>        | 100        | 133             |
| 4 N[Ets]N + 2 N[Gata]N + 1 N[E-Box]N <sup>†‡</sup> | 100        | 43              |

Combinations of Ets, GATA, and E-Box transcription factor binding sites (TFBS) conserved between human and mouse were selected on the basis of the Scl+19, Fli1+12, and Hhex+1 enhancers. Ets, GGAW; Gata, GATA; E-Box, CANNTG.

\*Combination selected on the basis of the Scl+19 enhancer.

<sup>†</sup>Combination selected on the basis of the Fli1+12 and Hhex+1 enhancers.

<sup>‡</sup>The stringency of the filters was increased by varying the number of TFBS within a defined nucleotide window and requiring conservation of nucleotides flanking the core consensus sequence N[TFBS]N. The *Gata2-3* hematopoietic enhancer passed each of these filters.
