# Supplementary material
Source: PubMed Central journal article supplement (PMC2077040)
Supplement: pnas_0707045104_6.pdf [file pnas_0707045104_6.pdf]

**SI Table 4. List of genes with one or more 4 N[Ets]N + 2 N[Gata]N + 1 N[E-Box]N clusters within a 100-bp window as summarized in Table 3**

| <b>Gene symbol</b> | <b>Gene name</b>                                                     |
|--------------------|----------------------------------------------------------------------|
| AT5G2              | ATP synthase lipid-binding protein                                   |
| ADK                | Adenosine kinase (Adenosine 5'-phosphotransferase)                   |
| ATBF1              | Alpha-fetoprotein enhancer binding protein (AT motif-binding factor) |
| AIP1               | Atrophin-1-interacting protein 1                                     |
| CTBP2              | C-terminal binding protein 2 (CtBP2)                                 |
| DACH1              | Dachshund homolog 1 (Dach1)                                          |
| DAB1               | Disabled homolog 1                                                   |
| RIB1               | Dolichyl-diphosphooligosaccharide-protein glycosyltransferase        |
| GATA2              | Endothelial transcription factor GATA-2                              |
| EPHA3              | Ephrin type-A receptor 3 precursor (MEK4)                            |
| FST                | Follistatin precursor (FS) (Activin-binding protein)                 |
| FLI1               | Friend leukemia integration 1 transcription factor                   |
| HS2ST              | Heparan sulfate 2-O-sulfotransferase 1 (2-OST)                       |
| HXC12              | Homeobox protein Hox-C12 (Hox-3.8) (Fragment)                        |
| HHEX               | Homeobox protein PRH (Hematopoietically expressed homeobox)          |
| JARD2              | Jumonji protein (Jumonji/ARID domain-containing protein 2)           |
| LAMC3              | Laminin gamma-3 chain precursor (Laminin 12 gamma 3 subunit)         |
| M3K1               | Mitogen-activated protein kinase kinase kinase 1 (MEKK 1)            |
| MEF2C              | Myocyte-specific enhancer factor 2C                                  |
| NTNG1              | Netrin G1 precursor (Laminin-1)                                      |
| NRCAM              | Neuronal cell adhesion molecule precursor                            |
| NTRI               | Neurotrimin precursor                                                |
| PAX2               | Paired box protein Pax-2                                             |
| PHX2B              | Paired mesoderm homeobox protein 2B                                  |
| PBX3               | Pre-B-cell leukemia transcription factor 3                           |
| CST                | Probable transcription factor CST                                    |
| PCCA               | Propionyl-CoA carboxylase alpha chain; mitochondrial precursor       |
| MSI2H              | RNA-binding protein Musashi homolog 2 (Musashi-2)                    |
| ALIA2              | Retinal dehydrogenase 2                                              |
| SETBP              | SET-binding protein (SEB) (Fragment)                                 |
| ITF2               | Transcription factor 4 (Immunoglobulin transcription factor 2)       |
| ETV6               | Transcription factor ETV6 (ETS-related protein Tel1) (Tel)           |
| TLE4               | Transducin-like enhancer protein 4 (Groucho-related protein 4)       |
| VTIL1A             | Vesicle transport through interaction with t-SNAREs homolog 1A       |
| YLPM1              | YLP motif containing protein 1 (Nuclear protein ZAP3)                |
| SIP1               | Zinc finger homeobox protein 1b (Smad interacting protein 1)         |
| FOG2               | Zinc finger protein ZFPM2 (Zinc finger protein multitype 2)          |

The code N[TFBS]N represents sequence conservation of the transcription factor binding site [TFBS] and flanking nucleotides between human and mouse.
