# Supplementary material
Source: PubMed Central journal article supplement (PMC2077040)

$\Delta$ Fli1+12

mE4E5Fli1+12

mG1Fli1+12

mG2EBoxFli1+12

Fetal Liver

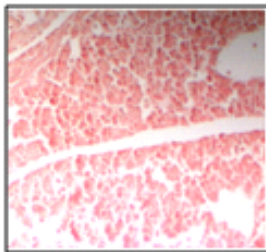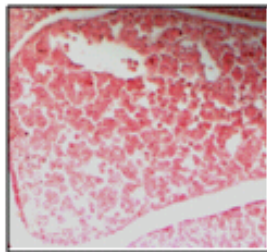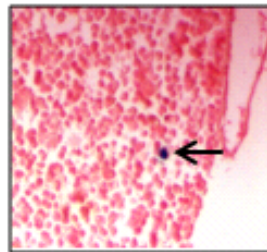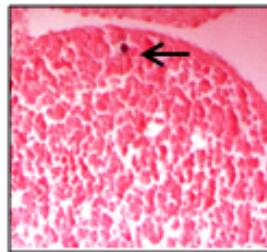

Heart

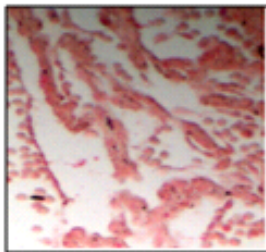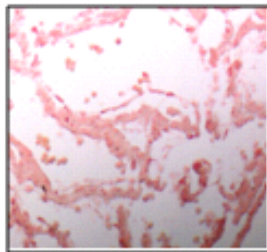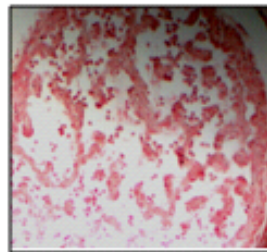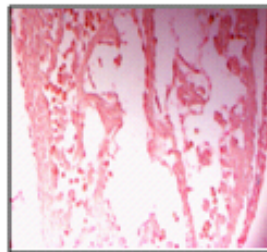

Dorsal Aorta

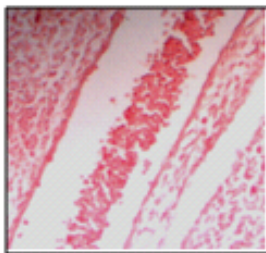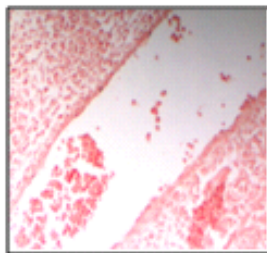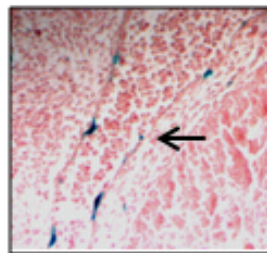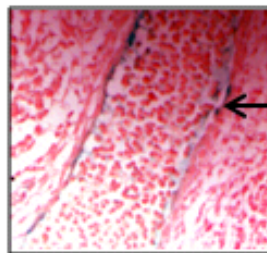

Supplement: pnas_0707045104_1.pdf [file pnas_0707045104_1.pdf]

Flk1

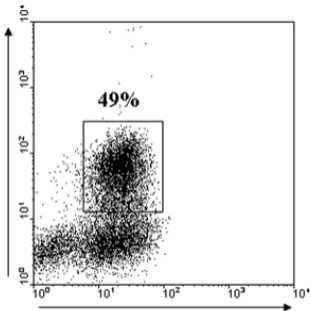

GFP-Bry

Supplement: pnas_0707045104_2.pdf [file pnas_0707045104_2.pdf]
